# Supplementary material for: Cell motility and migration as determinants of stem cell efficacy
Source: PubMed Central journal article supplement — eBioMedicine. 2020 Sep 10;60:102989. doi: 10.1016/j.ebiom.2020.102989 (PMC7494685; doi:10.1016/j.ebiom.2020.102989), 2020-09-10

Supplemental Information for

## Cell motility and migration as determinants of stem cell efficacy

Lusine Danielyan<sup>1,2\*</sup>, Matthias Schwab<sup>1,2,3,4</sup>, Georg Siegel<sup>5</sup>, Bianca Brawek<sup>6</sup>, Olga Garaschuk<sup>6</sup>, Nithi Asavapanumas<sup>6</sup>, Marine Buadze<sup>1</sup>, Ali Lourhmati<sup>1</sup>, Hans-Peter Wendel<sup>7</sup>, Meltem Avci-Adali<sup>7</sup>, Marcel A. Krueger<sup>8</sup>, Carsten Calaminus<sup>8</sup>, Ulrike Naumann<sup>9</sup>, Stefan Winter<sup>3</sup>, Elke Schaeffeler<sup>3</sup>, Annett Spogis<sup>1</sup>, Sandra Beer-Hammer<sup>10</sup>, Jonas J. Neher<sup>11,12</sup>, Gabriele Spohn<sup>13</sup>, Anja Kretschmer<sup>13</sup>, Eva-Maria Krämer-Albers<sup>14</sup>, Kerstin Barth<sup>14</sup>, Hong Jun Lee<sup>15,16</sup>, Seung U. Kim<sup>17</sup>, William H. Frey II<sup>18</sup>, Claus D. Claussen<sup>19</sup>, Dirk M. Hermann<sup>20</sup>, Thorsten R. Doeppner<sup>20,21</sup>, Erhard Seifried<sup>13</sup>, Christoph H. Gleiter<sup>1</sup>, Hinnak Northoff<sup>5</sup> & Richard Schäfer<sup>5,13</sup>

<sup>1</sup>Department of Clinical Pharmacology, University Hospital Tübingen, Tübingen, Germany

<sup>2</sup> Neuroscience Laboratory and Departments of Biochemistry and Clinical Pharmacology, Yerevan State Medical University, Yerevan, Armenia

<sup>3</sup>Dr. Margarete Fischer-Bosch Institute of Clinical Pharmacology, Stuttgart, Germany and University of Tübingen, Tübingen, Germany

<sup>4</sup>Department of Pharmacy and Biochemistry, University of Tübingen, Tübingen, Germany

<sup>5</sup>Institute of Clinical and Experimental Transfusion Medicine, University Hospital Tübingen, Tübingen, Germany

<sup>6</sup>Institute of Physiology, Department of Neurophysiology, University of Tübingen, Tübingen, Germany

<sup>7</sup>Department of Thoracic, Cardiac and Vascular Surgery, University Hospital Tübingen, Tübingen, Germany

<sup>8</sup>Werner Siemens Imaging Center, Department of Preclinical Imaging and Radiopharmacy, University Hospital Tübingen, Tübingen, Germany

<sup>9</sup>Hertie Institute for Clinical Brain Research and Center Neurology, Department of Vascular Neurology, Tübingen Neuro-Campus (TNC), University of Tübingen, Tübingen, Germany

<sup>10</sup>Department of Pharmacology, Experimental Therapy and Toxicology, Institute of Experimental and Clinical Pharmacology and Pharmacogenomic, and ICePhA, University Hospital Tübingen, Tübingen, Germany

<sup>11</sup>Department of Cellular Neurology, Hertie Institute for Clinical Brain Research, University of Tübingen, Tübingen, Germany

<sup>12</sup>German Center for Neurodegenerative Diseases (DZNE), Tübingen, Tübingen, Germany

*Supplementary Information – Danielyan et al.*

<sup>13</sup>Institute for Transfusion Medicine and Immunohematology, German Red Cross Blood Donor Service Baden-Württemberg-Hessen gGmbH, Goethe-University Hospital, Frankfurt am Main, Germany

<sup>14</sup>Institute for Developmental Biology and Neurobiology, Johannes Gutenberg University Mainz, Mainz, Germany

<sup>15</sup>College of Medicine and Medical Research Institute, Chungbuk National University, Cheongju, Chungbuk, Republic of Korea;

<sup>16</sup> Research Institute eBiogen Inc., Seoul, Republic of Korea

<sup>17</sup>Division of Neurology, Department of Medicine, UBC Hospital, University of British Columbia, Vancouver, BC, Canada

<sup>18</sup>HealthPartners Center for Memory and Aging, HealthPartners Neurosciences, St. Paul, MN, U.S.A.

<sup>19</sup>Department of Radiology, University Hospital Tübingen, Tübingen, Germany

<sup>20</sup>Department of Neurology, University of Duisburg-Essen, Essen, Germany

<sup>21</sup>Department of Neurology, University Medical Center Göttingen, Göttingen, Germany

This file includes Supplementary Figures 1-6

## Supplementary Figure 1

**a**

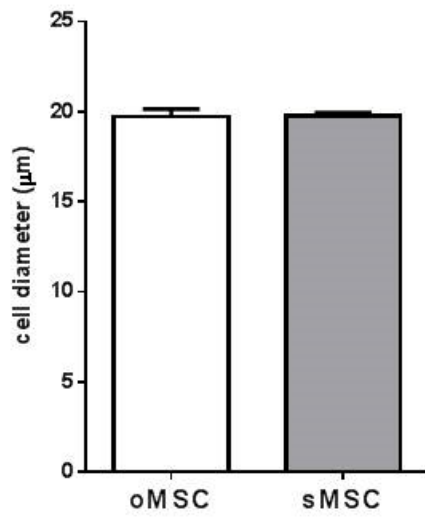

**b**

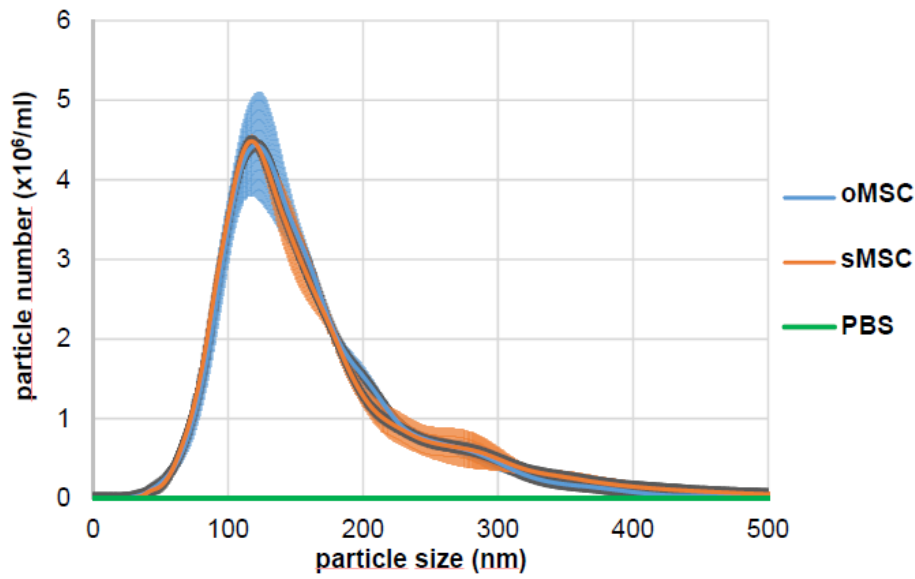

|                                             | oMSC        | sMSC       |
|---------------------------------------------|-------------|------------|
| Mean size (nm)                              | 159 +/-2.8  | 164 +/-7.8 |
| Total number (10 <sup>8</sup> particles/ml) | 5.06 +/-0.6 | 4.5 +/-0.5 |

**c**

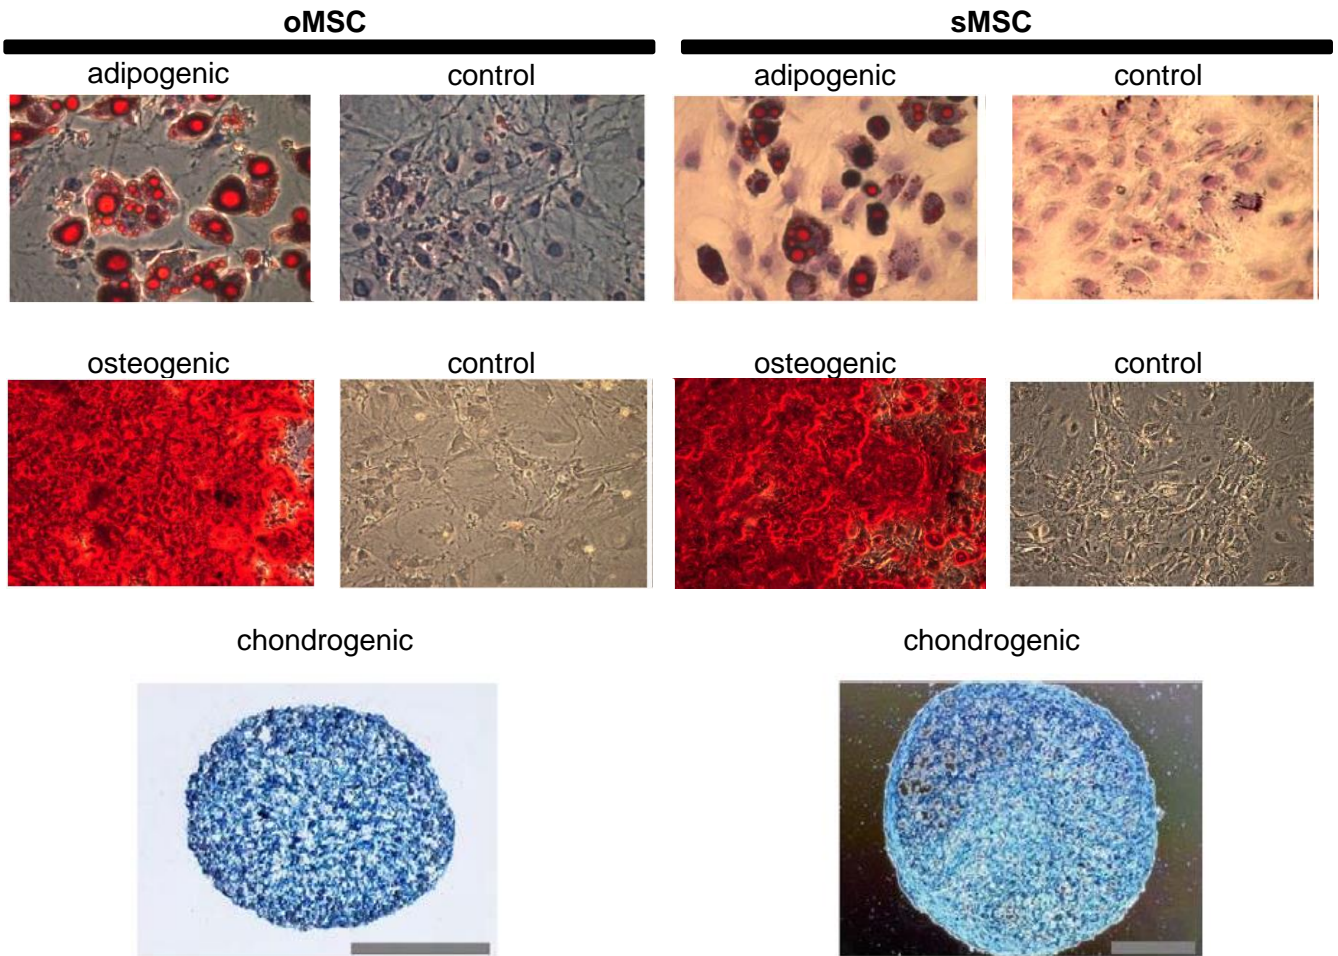

**d**

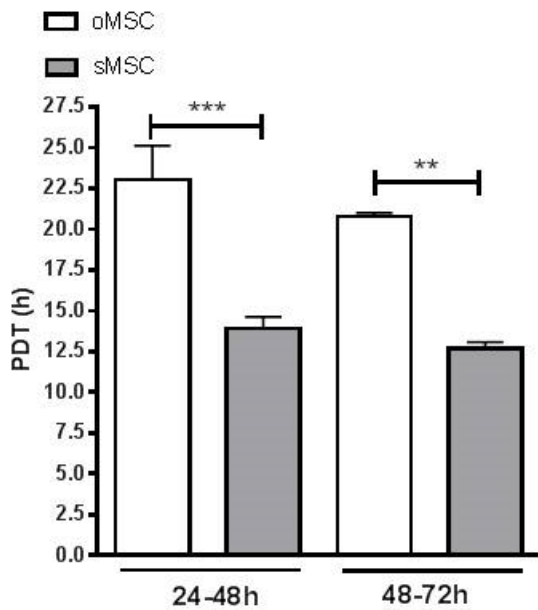

e

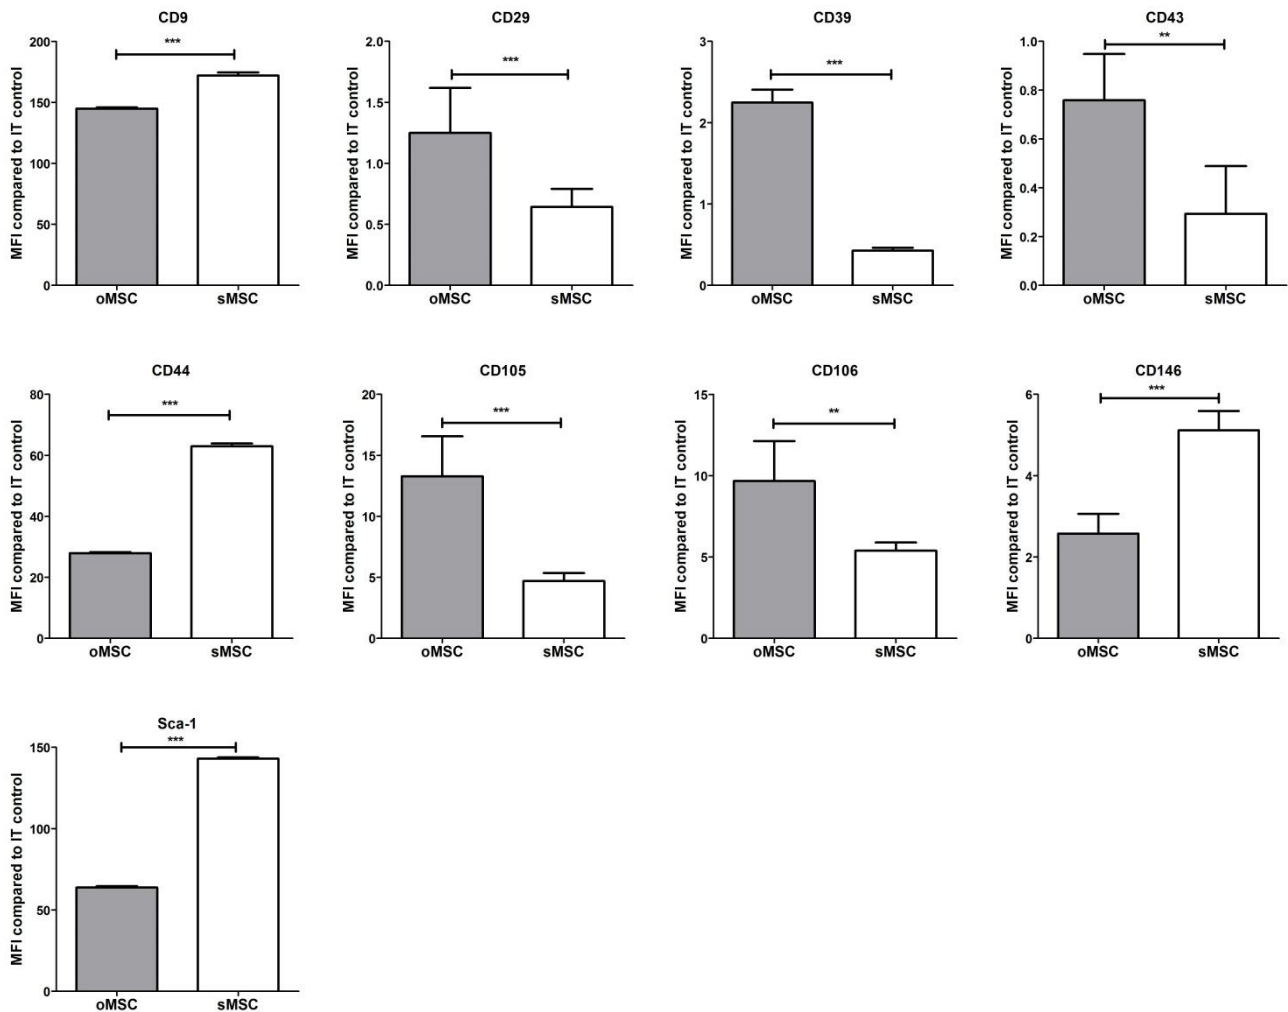

### Supplementary Figure 1. Characterization of murine oMSC and sMSC.

**a**, morphology assessed by cell diameter. Mean cell diameter did not differ between oMSC ( $19.73 \mu\text{m} \pm 1.22 \mu\text{m}$  SD) and sMSC ( $19.75 \mu\text{m} \pm 0.57 \mu\text{m}$  SD),  $n=9$  per group; two-tailed t-test. Error bars: SEM. **b**, nanoparticle tracking analysis of small extracellular vesicles (small-EVs) derived from oMSC and sMSC ( $n=3$ ). EVs were isolated by differential centrifugation. Final  $100.000 \times g$  pellets were re-suspended in PBS and size-distribution of EVs was determined by laser-based particle tracking. EVs secreted from oMSC and sMSC do not differ in size and amount. Error bars: SEM. Mean particle size and the total number of particles (area under the curve) collected from each sample type are denoted in the table below the graph. **c**, in vitro differentiation capacity. No differences of in vitro differentiation potential could be detected between oMSC and sMSC. Lipid vacuoles of adipogenically differentiated MSC are stained in red with Oil-Red-O, calcium deposits of osteogenic differentiated MSC are stained in red with

*Supplementary Information – Danielyan et al.*

Alizarin Red S, and chondrogenic differentiation of MSC pellets are stained in bluish-green by Alcian blue. Original magnifications: 200x (adipogenic, control), 100x (osteogenic, control), 4x (chondrogenic [scale bars: 500  $\mu\text{m}$ ]). **d**, in vitro growth kinetics. Population doubling time (PDT) was determined between 24-48 h and 48-72 h after seeding of cells onto the cell culture dish n=3; One-way ANOVA with Bonferroni's multiple comparisons test (\*\*p <0.01, oMSC vs. sMSC at 48-72 h; \*\*\*p<0.001, oMSC vs. sMSC at 24-48 h). Error bars: SEM. **e**, flow cytometry analyses of mean fluorescence intensity (MFI). sMSC featured higher expression of CD9 (Tspan29), CD44 (H-CAM), CD146 (MCAM) and Sca-1 on sMSC, whereas CD29 (Integrin  $\beta$ 1), CD39 (ENTPD1), CD43 (Sialophorin), CD105 (Endoglin), CD106 (VCAM-1) were higher expressed on oMSC, n=3; two-tailed t-test (\*p<0.05; \*\*p <0.01; \*\*\*p<0.001). Error bars: SD.

Supplementary Figure 2

a

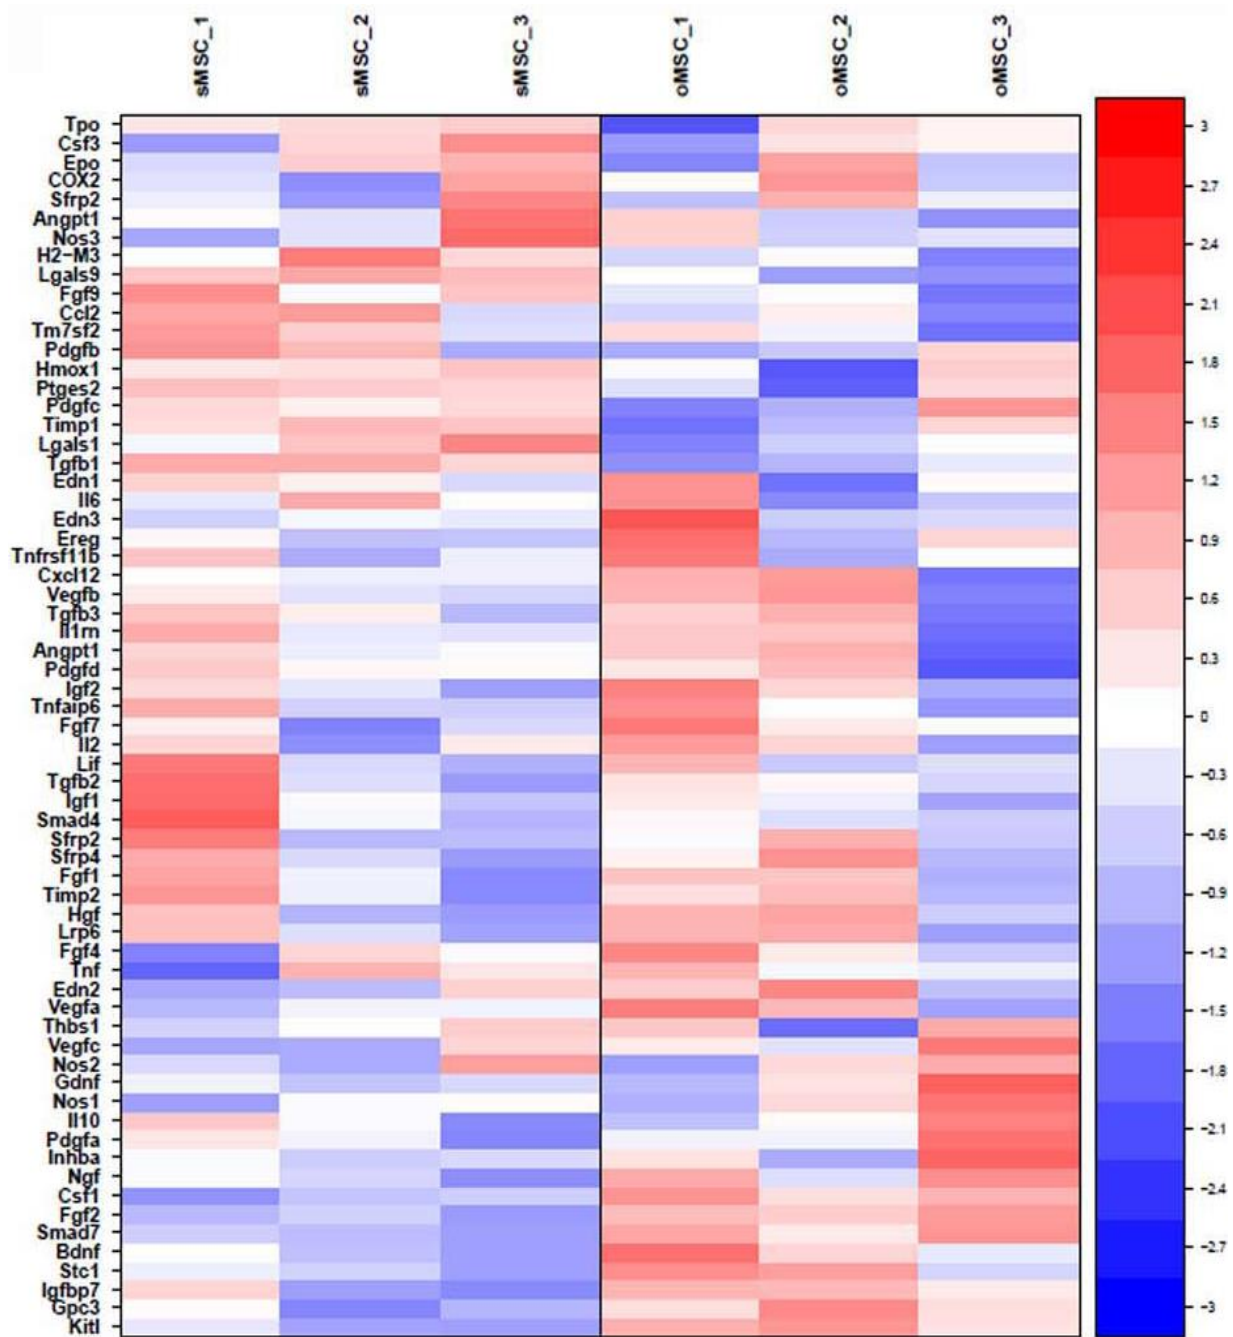

b

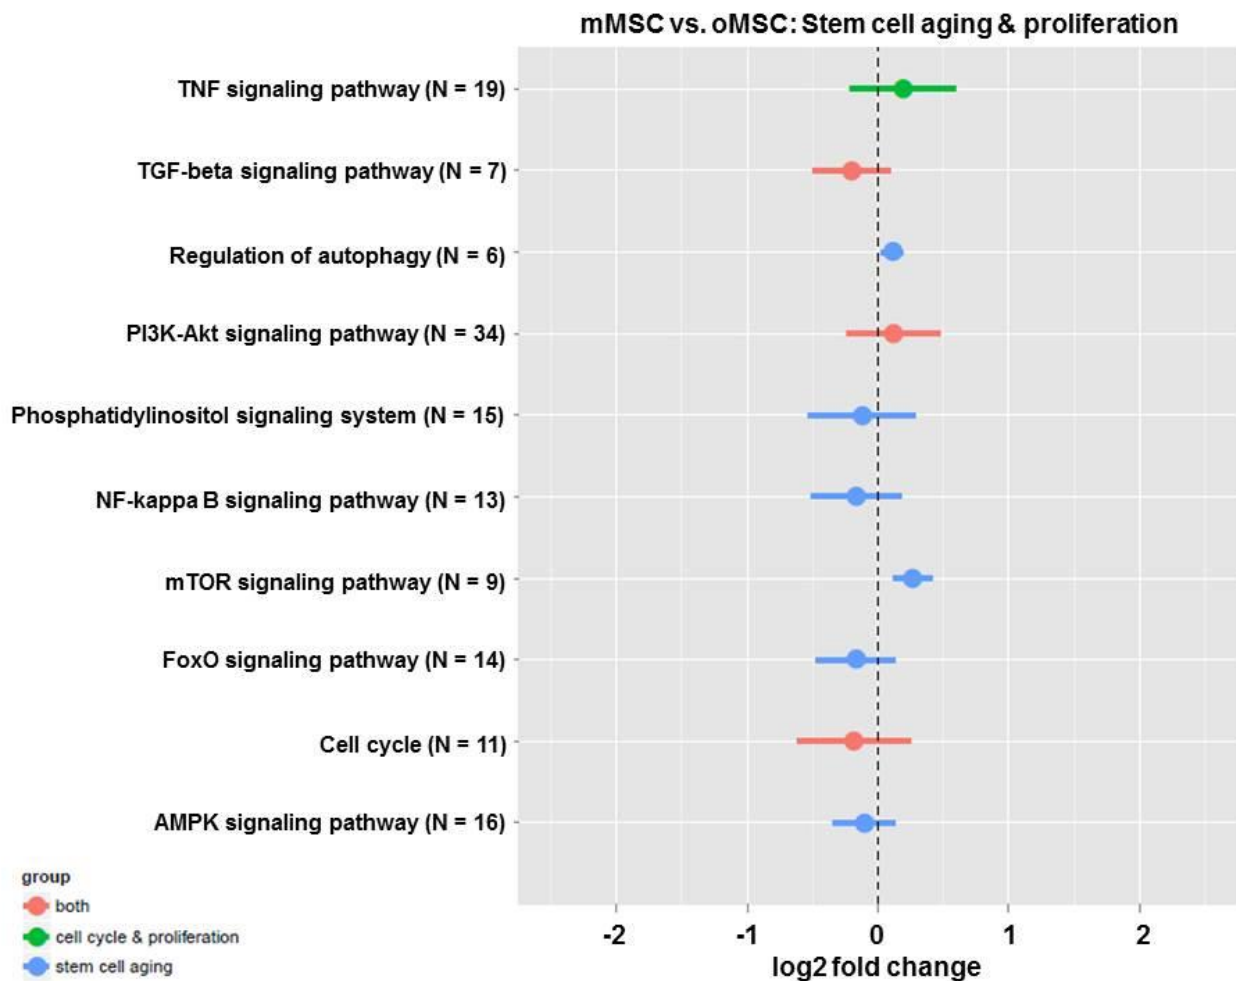

### Supplementary Figure 2. Microarray analysis of murine oMSC and sMSC.

**a**, heatmap of microarray data displaying genes related to trophic factors, thereby highlighting - in contrast to genes involved in cell migration and/or adhesion - considerable heterogeneity between passages. The heatmap shows row-wise z-scores of normalized log<sub>2</sub> signal intensities in murine oMSC and sMSC; n=3 arrays per group (3 different passages). Genes are ordered according to complete-linkage hierarchical clustering based on Pearson correlation coefficients, which were calculated across all six arrays. Z-scores were color-coded as indicated by the colorbar on the right. Of all the genes displayed, only *Smad7* differed significantly and relevantly between sMSC and oMSC ( $p=0.048$ ,  $FC=0.45$ ) **b**, median effect sizes  $\pm$  MAD (median absolute deviation) between murine oMSC and sMSC for KEGG mouse pathways related to stem cell aging and cell cycle & proliferation. For each pathway, the median and MAD were calculated



*Supplementary Information – Danielyan et al.*

based on all corresponding genes, which show a significant difference between oMSC and sMSC ( $p < 0.05$ ); the number of those genes is given in brackets. For each gene, the effect size was defined as median across the  $\log_2$  fold change (sMSC/oMSC) in each of the three passages.

Supplementary Figure 3

a

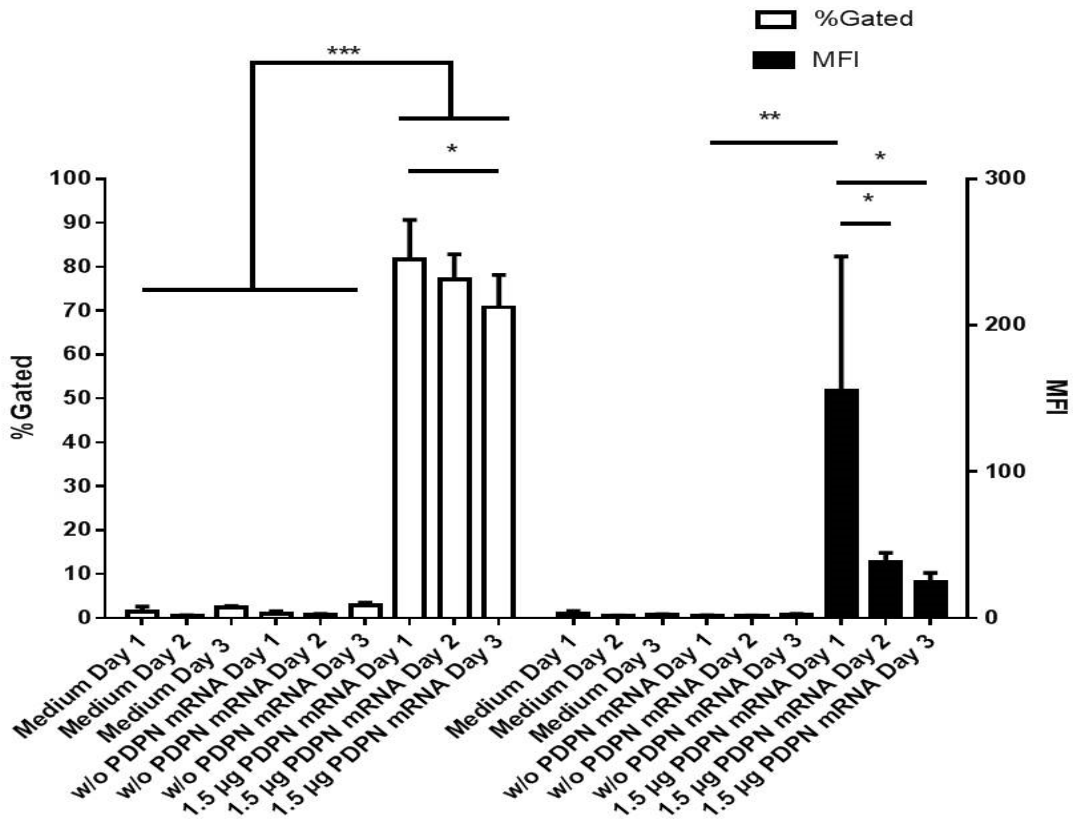

b

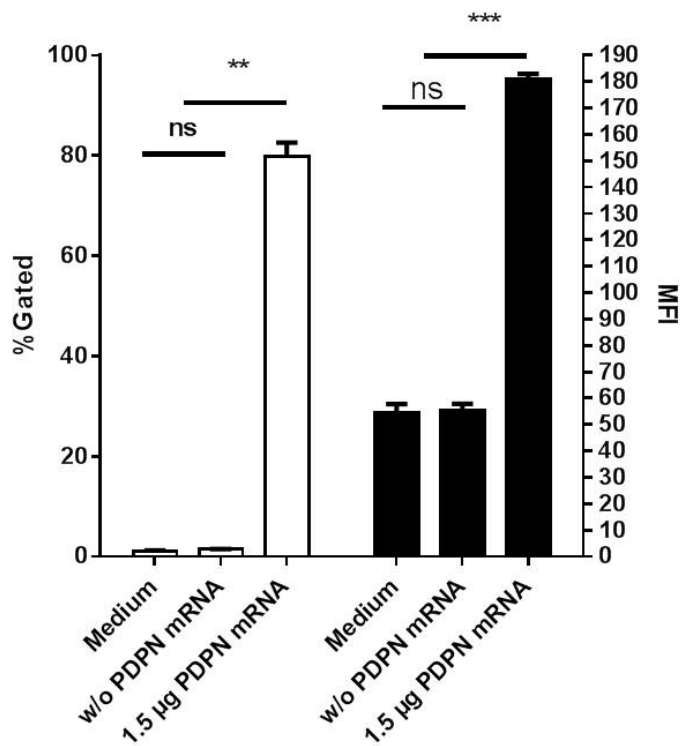

Supplementary Figure 3. Evaluation of podoplanin engineering of oMSC and oHB1.F3 NSC.

*Supplementary Information – Danielyan et al.*

**a**, flow cytometry analysis of PDPN protein on days 1-3 after transfection of murine oMSC (P64, P72) with either transfection vehicle, transfection medium, or 1.5 µg PDPN mRNA, n=3; One-way ANOVA with Bonferroni's multiple comparisons test (\*p<0.05; \*\*p <0.01; \*\*\*p <0.001). Error bars: SEM. **b**, flow cytometry analysis of PDPN protein 72 h after transfection of human HB1.F3 NSC with either transfection vehicle, transfection medium, or 1.5 µg PDPN mRNA, n=3; One-way ANOVA with Bonferroni's multiple comparisons test (\*\*p <0.01; \*\*\*p <0.001). Error bars: SEM.

Supplementary Figure 4

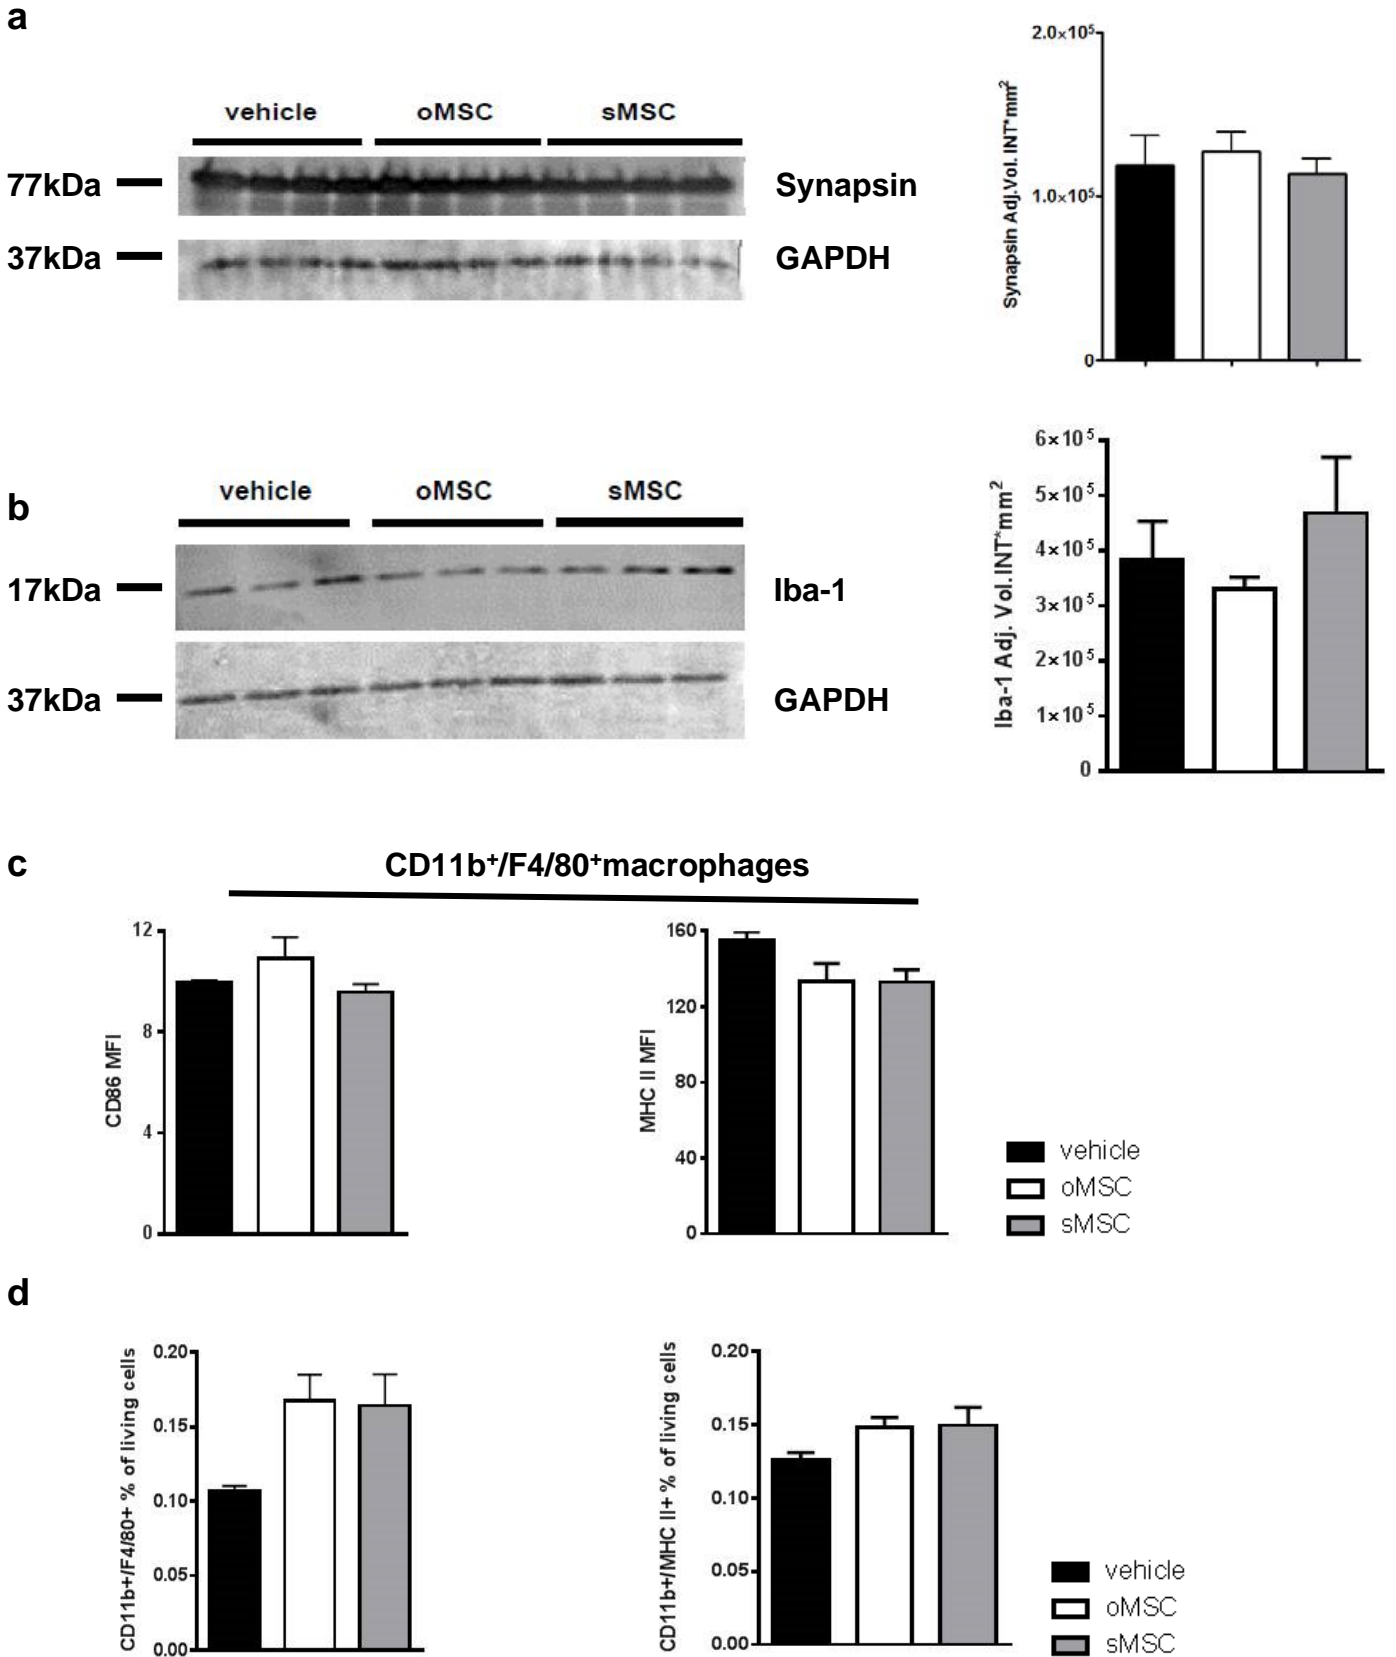

e

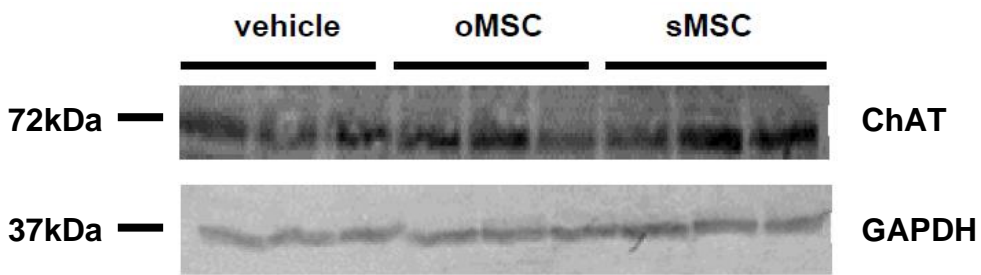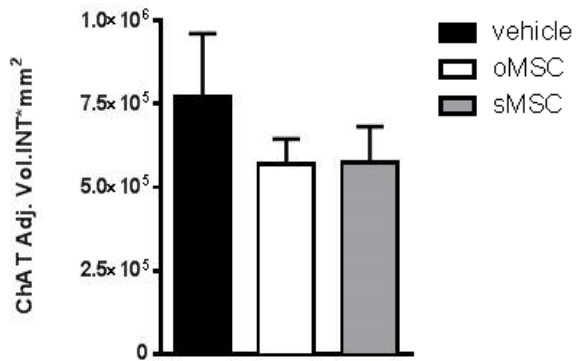

f

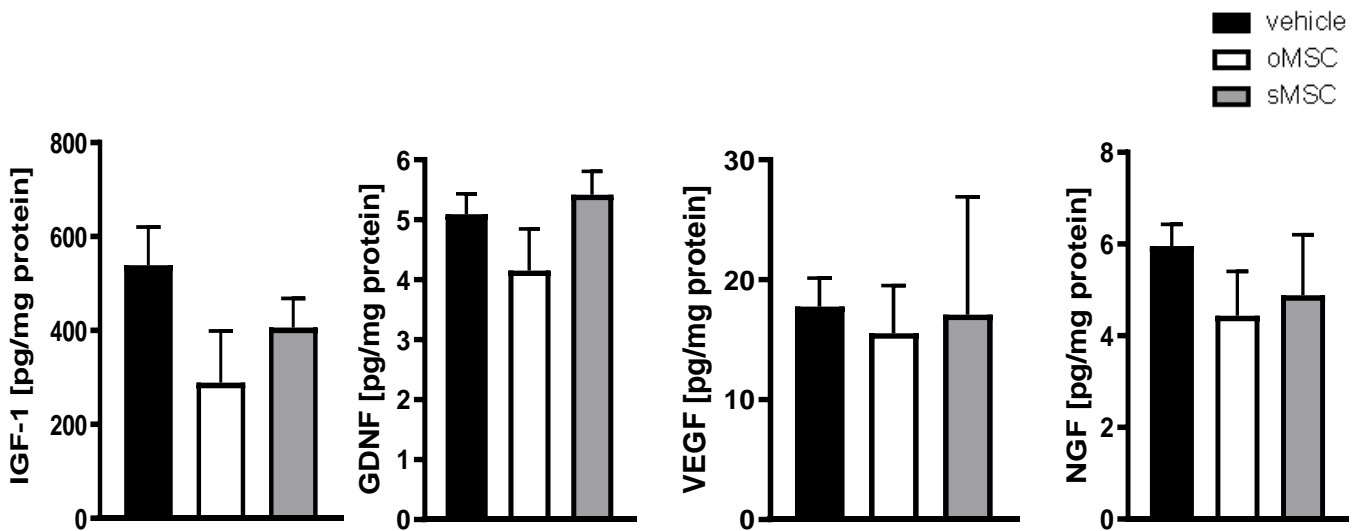

g

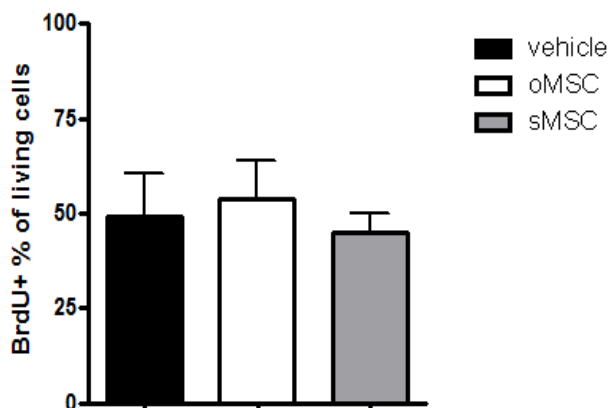

**Supplementary Figure 4. In vivo concentrations of trophic factors and immune cells after murine oMSC or sMSC transplantation in the murine 3xTg-AD model.**

**a**, Western blot with densitometric analysis of synapsin in brain homogenates of 13-month old 3xTg-AD mice after INA of oMSC and sMSC. One-way ANOVA with Bonferroni's multiple comparisons test, n=4. Error bars: SEM. **b**, Western blot with densitometric analysis of Ionized Calcium-binding Adapter Molecule (Iba)-1 in brain homogenates of 13-months old 3xTg-AD mice after INA of oMSC and sMSC, n=3; One-way ANOVA with Bonferroni's multiple comparisons test. Error bars: SEM. **c**, flow cytometry analyses of CD86 and MHC II (both markers of M1 polarization of macrophages) in CD11b+ /F4/80+ macrophages from brain cells suspensions of 13-months old 3xTg-AD mice after INA of sMSC and oMSC, n=3; One-way ANOVA with Bonferroni's multiple comparisons test. Error bars: SEM. **d**, INA of oMSC and sMSC did not change the number of M1 macrophages reflected by total percentage of CD11b/MHC II+ cells and by mean fluorescence intensity (MFI) of CD86 and MHC II in CD11b+/F4/80+ macrophages, n=3; One-way ANOVA with Bonferroni's multiple comparisons test. Error bars: SEM. **e**, Western blot with densitometric analysis of Choline Acetyltransferase (ChAT) in brain homogenates of 13-months old 3xTg-AD mice after INA of oMSC and sMSC, n=3; One-way ANOVA with Bonferroni's multiple comparisons test. Error bars: SEM. Densitometric analyses of ChAT, synapsin and Iba-1 are shown as adjusted volume intensity x mm<sup>2</sup> normalized to the GAPDH. **f**, quantification of insulin-like growth factor (IGF)-1, glial cell line-derived neurotrophic factor (GDNF), vascular endothelial growth factor (VEGF) and nerve growth factor (NGF) by ELISA in brain homogenates of 13-months old 3xTg-AD mice after INA of oMSC and sMSC, n=3-6; One-way ANOVA with Bonferroni's multiple comparisons test. Error bars: SEM. **g**, flow cytometry analysis of BrdU+ cells from brain suspensions of 13-month old 3xTg-AD mice after INA of sMSC and oMSC. BrdU was injected intraperitoneally (0.03 mg/kg BW) and added to drinking water (1mg/mL) 3 days prior to sacrifice, n=3; One-way ANOVA with Bonferroni's multiple comparisons test. Error bars: SEM.

## Supplementary Figure 5

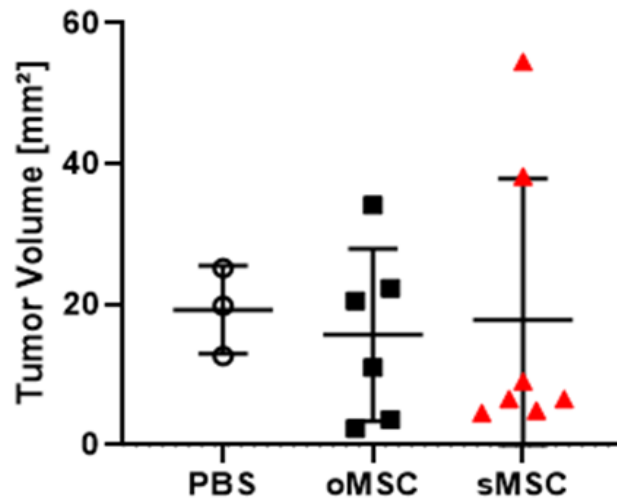

### Supplementary Figure 5. Tumour size of oMSC and sMSC treated C57/BL6 mice after GL-261 implantation.

Tumours assessed by MRI as shown in the main Figure 8 were analysed by manual tumour volume determination. Data and means are shown for oMSC (n=6), sMSC (n=7) and vehicle (PBS, n=3) groups 21 days post GL261-luc injection. One-way ANOVA with Bonferroni's multiple comparisons test. Error bars: SEM.

## Supplementary Figure 6

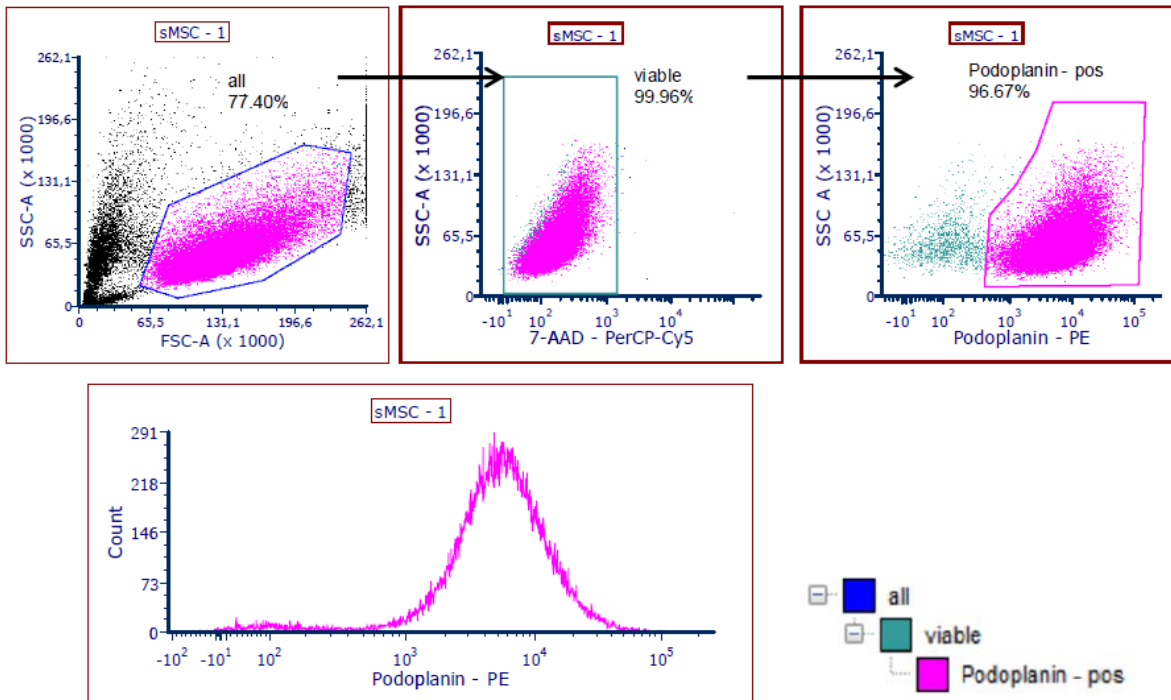

### Supplementary Figure 6. Flow cytometry gating strategy.

Exemplary flow cytometry plots and histogram show the gating strategy of podoplanin expression analysis on sMSC. Non-viable cells were identified and excluded from further analysis by 7-AAD staining.



**Uncropped gels**

Fig.3a PDPN

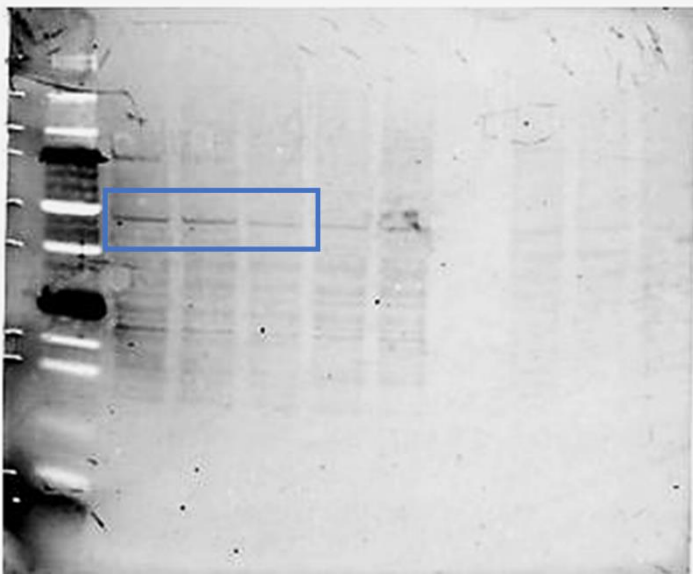

Fig.3a GAPDH

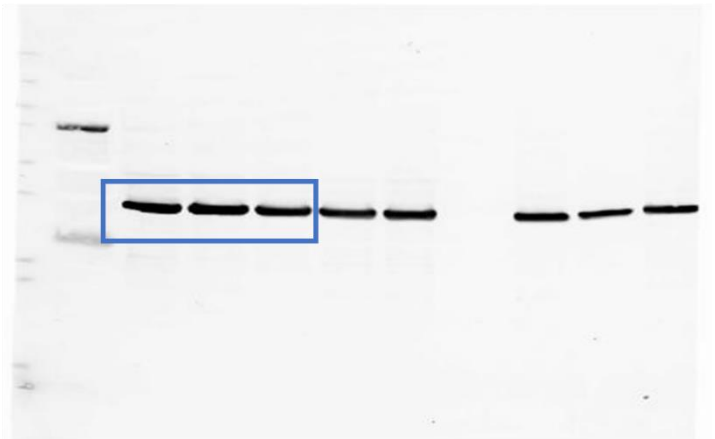

Fig.6c Synaptophysin

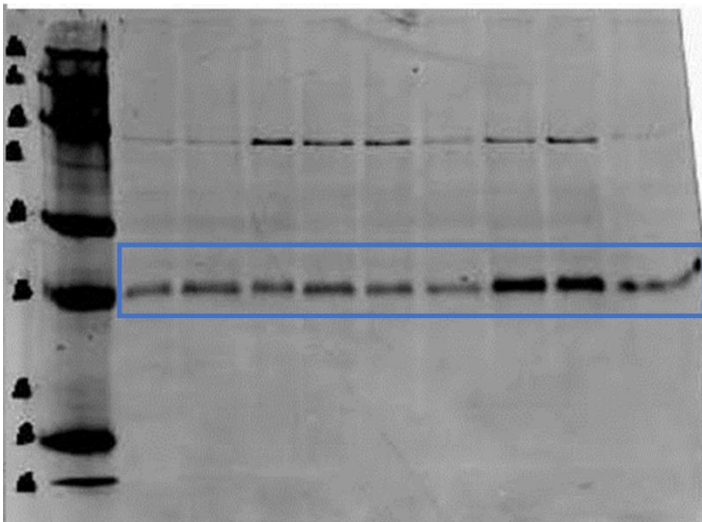

Fig.6c GAPDH

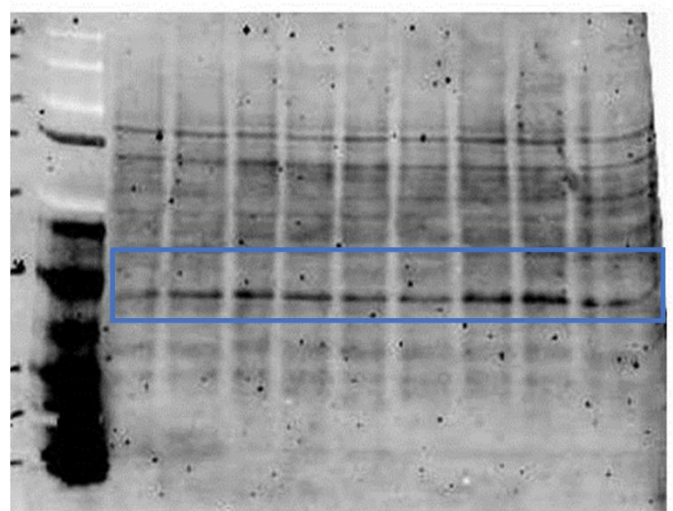

Supplementary Information – Danielyan et al.

Synapsin Suppl Fig.4a

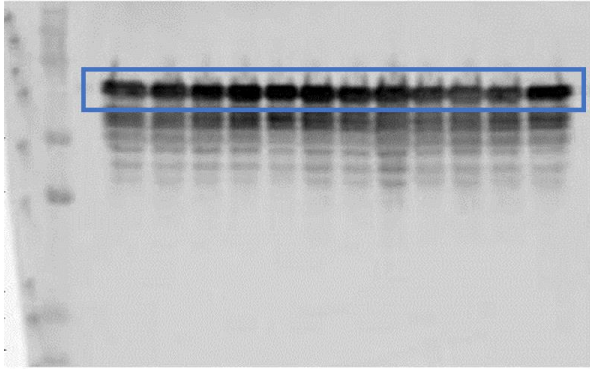

GAPDH Suppl Fig.4a

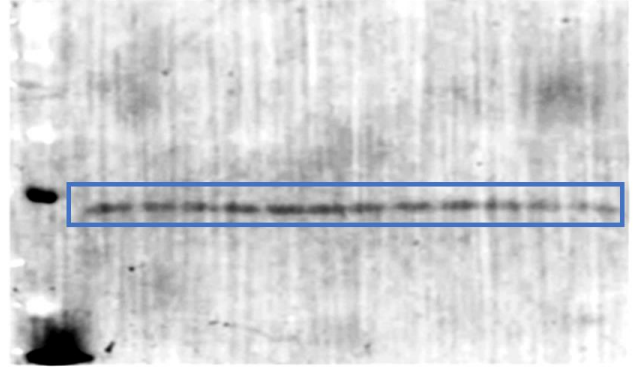

Iba-1 Suppl Fig.4b

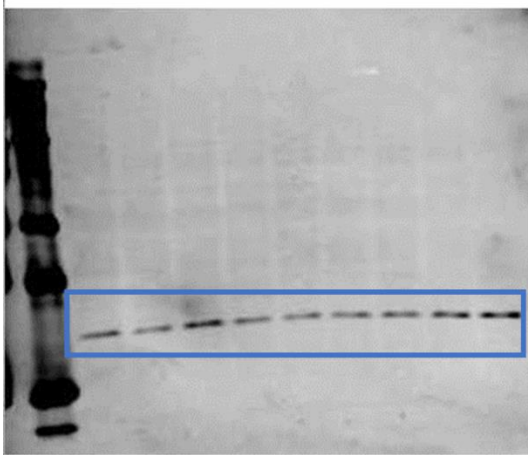

GAPDH Suppl Fig.4b

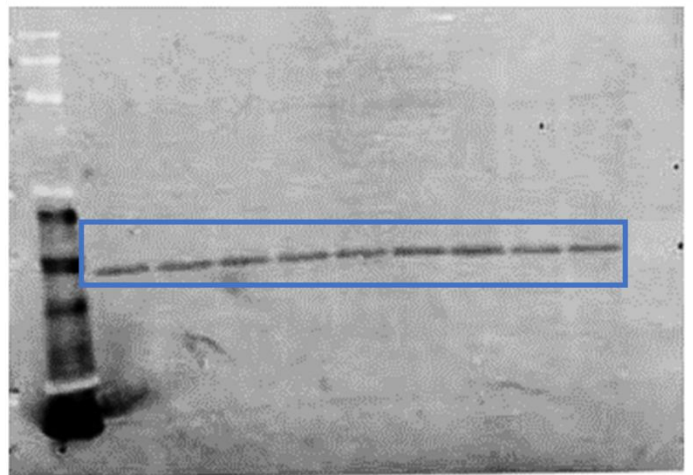

ChAT Suppl Fig.4e

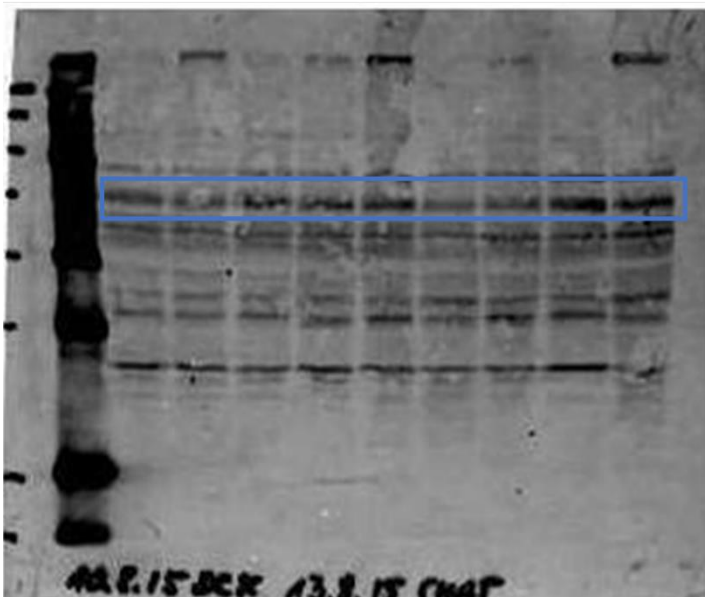

GAPDH Suppl Fig.4e

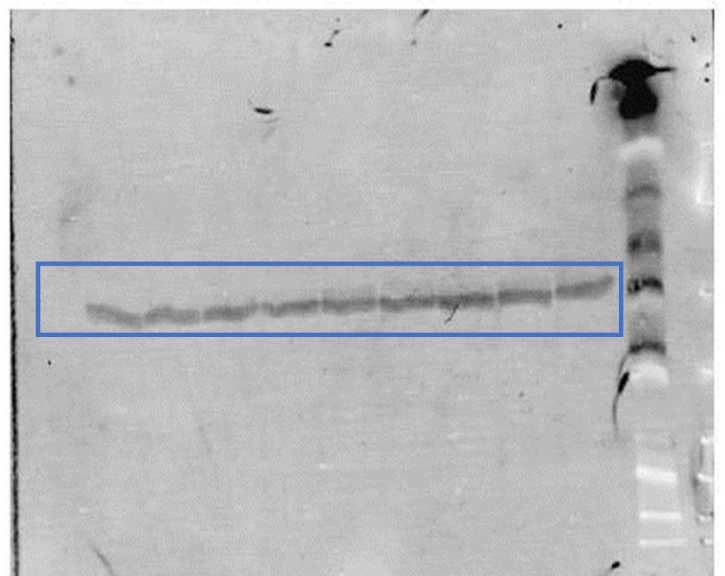

Supplement: mmc1.pdf [file mmc1.pdf]
